# Supplementary material for: miR-301b~miR-130b—PPARγ axis underlies the adipogenic capacity of mesenchymal stem cells with different tissue origins
Source: PubMed Central journal article supplement (PMC5430834; doi:10.1038/s41598-017-01294-2), 2017-04-25
Supplement: 41598_2017_1294_MOESM1_ESM.pdf [file 41598_2017_1294_MOESM1_ESM.pdf]

## Supplementary Information

### miR-301b~miR-130b—PPAR $\gamma$ axis underlies the adipogenic capacity of mesenchymal stem cells with different tissue origins

Lulu Liu<sup>1,4</sup>, Haihui Liu<sup>2,4</sup>, Mingtai Chen<sup>1,4</sup>, Saisai Ren<sup>2</sup>, Panpan Cheng<sup>3</sup>, Hao Zhang<sup>3\*</sup>

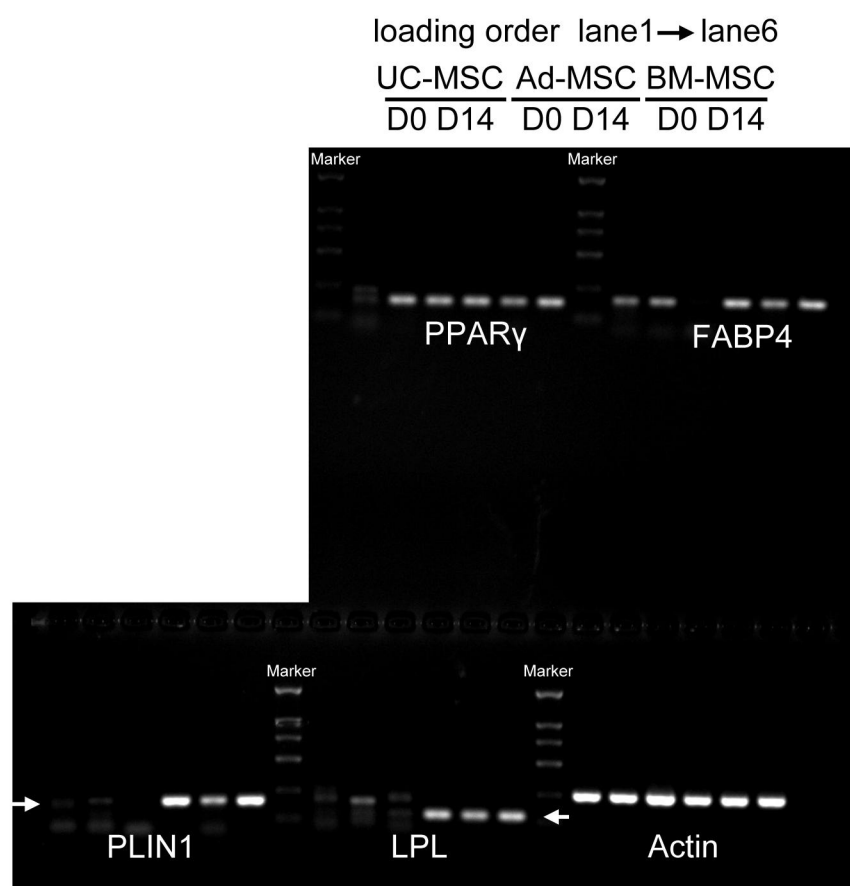

Supplementary Figure 1. Comparison of adipogenic gene expression in the three tissues-derived MSCs by RT-PCR. UC-MSC, Ad-MSC and BM-MSC were incubated with or without adipogenic medium for 14 days. Adipogenic markers including PPAR $\gamma$ , FABP4, PLIN1 and LPL were detected at the indicated days of differentiation. Actin was used as a loading control. (Original picture)

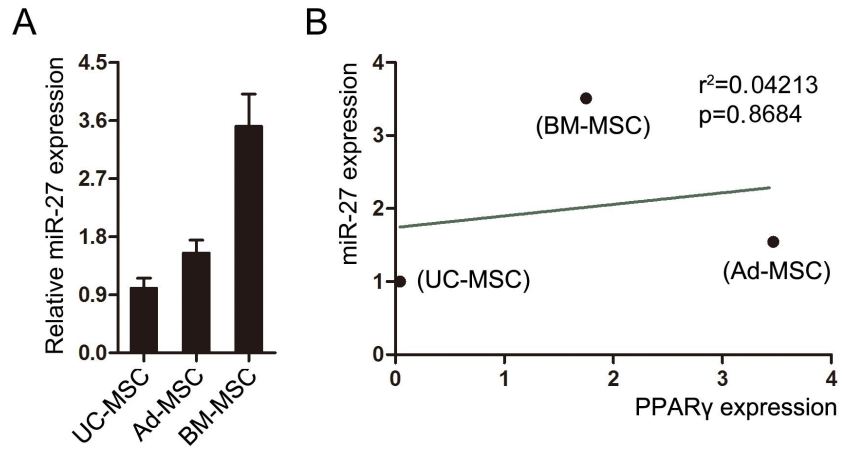

Supplementary Figure 2. Correlation analysis of miR-27 expression with PPAR $\gamma$  expression in the three sources-derived MSCs. (A) The expression of miR-27 was detected in UC-MSC, Ad-MSC and BM-MSC. (B) The correlation of miR-27 expression with PPAR $\gamma$  expression in the three sources-derived MSCs was performed using linear regression analysis.

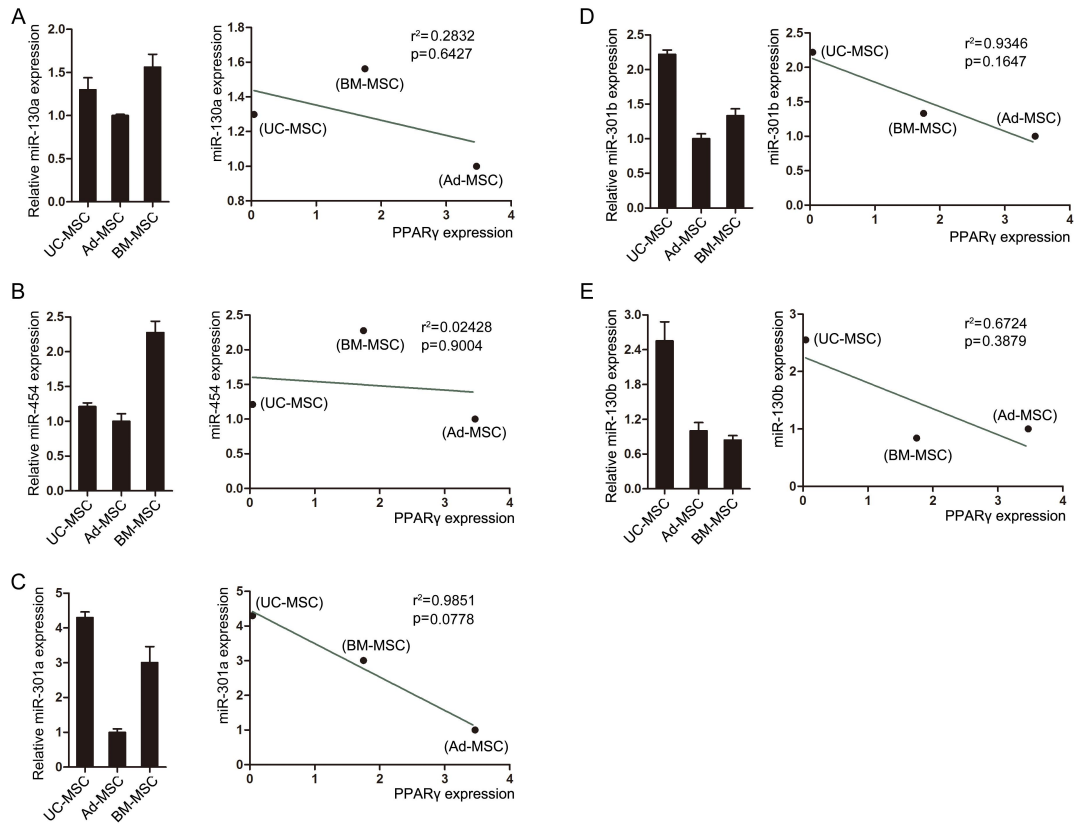

Supplementary Figure 3. Correlation analysis of miR-130/301/454 family expression with PPAR $\gamma$  expression in the three sources-derived MSCs. (A) The expression of miR-130a and its correlation with PPAR $\gamma$  expression in UC-MSC, Ad-MSC and BM-MSC. (B) The expression of miR-454 and its correlation with PPAR $\gamma$  expression in UC-MSC, Ad-MSC and BM-MSC. (C) The expression of miR-301a and its correlation with PPAR $\gamma$  expression in UC-MSC, Ad-MSC and BM-MSC. (D) The expression of miR-301b and its correlation with PPAR $\gamma$  expression in UC-MSC, Ad-MSC and BM-MSC. (E) The expression of miR-130b and its correlation with PPAR $\gamma$  expression in UC-MSC, Ad-MSC and BM-MSC.
